# Supplementary material for: Antiproliferative and Pro-Apoptotic Activity and Tubulin Dynamics Modulation of 1H-Benzimidazol-2-yl Hydrazones in Human Breast Cancer Cell Line MDA-MB-231
Source: MDPI journal article supplement (doi:10.3390/molecules29102400), 2024-05-20
Supplement: s1 [file s1]

# Antiproliferative, Pro-apoptotic Activity And Tubulin Dynamics Modulation of 1*H*-benzimidazol-2-yl Hydrazones in Human Breast Cancer Cell Line MDA-MB-231

Denitsa Yancheva <sup>1,\*</sup>, Maria Argirova <sup>1</sup>, Irina Georgieva <sup>2</sup>, Vanya Milanova <sup>2</sup>, Maya Guncheva <sup>1</sup>, Miroslav Rangelov <sup>1</sup>, Nadezhda Todorova <sup>3</sup>, Rumiana Tzoneva <sup>2,\*</sup>

- <sup>1</sup> Institute of Organic Chemistry with Centre of Phytochemistry, Bulgarian Academy of Sciences, Acad. G. Bonchev St., Build. 9, 1113 Sofia, Bulgaria; [denitsa.pantaleeva@orgchm.bas.bg](mailto:denitsa.pantaleeva@orgchm.bas.bg) (D. Y.); [maria.argirova@orgchm.bas.bg](mailto:maria.argirova@orgchm.bas.bg) (M. A.); [maya.guncheva@orgchm.bas.bg](mailto:maya.guncheva@orgchm.bas.bg) (M. G.); [miroslav.rangelov@orgchm.bas.bg](mailto:miroslav.rangelov@orgchm.bas.bg) (M. R.);
- <sup>2</sup> Institute of Biophysics and Biomedical Engineering, Bulgarian Academy of Sciences, Acad. G. Bonchev St., Build. 21, 1113 Sofia, Bulgaria; [igeorgieva@biomed.bas.bg](mailto:igeorgieva@biomed.bas.bg) (I. G.); [vanyamilanova99@gmail.com](mailto:vanyamilanova99@gmail.com) (V. M);
- <sup>3</sup> Institute of Biodiversity and Ecosystem Research, Bulgarian Academy of Sciences, 2 Gagarin Str., 1113 Sofia, Bulgaria; [nadeshda@abv.bg](mailto:nadeshda@abv.bg) (N. T.)
- \* Correspondence: [tzoneva@bio21.bas.bg](mailto:tzoneva@bio21.bas.bg) (R. Tz.); [denitsa.pantaleeva@orgchm.bas.bg](mailto:denitsa.pantaleeva@orgchm.bas.bg) (D. Y.)

## Contents:

|                                                                                                                                                                |          |
|----------------------------------------------------------------------------------------------------------------------------------------------------------------|----------|
| <b>Figs. S1-S6.</b> IR and NMR spectra of compounds <b>5c</b> and <b>5d</b>                                                                                    | p. 3-6   |
| <b>Figs. S7-S10.</b> HRMS spectra of compounds <b>5a-d</b>                                                                                                     | p. 7-10  |
| <b>Table S1-S2.</b> Optimized molecular structure and relative Gibbs energies of hydrazone <b>5c</b> in imino and amino tautomeric form                        | p. 11-13 |
| <b>Table S3.</b> Summarized total Gibbs energies, relative Gibbs energies and Boltzmann population for the tautomeric and isomeric forms of compound <b>5c</b> | p. 14    |
| <b>Table S4-S5.</b> Optimized molecular structure and relative Gibbs energies of                                                                               | p. 15-17 |

hydrazone **5d** in imino and amino tautomeric form

**Table S6.** Summarized total Gibbs energies, relative Gibbs energies and Boltzmann population for all tautomeric and isomeric forms of compound **5d** p. 18

**Table S7-S8.** Chemical shifts for the tautomeric and isomeric forms of compounds **5c** and **5d** predicted by GIAO method in DMSO solvent and experimental data for **5c** and **5d**. p. 19-23

**Fig. S11.** Tubulin (final 54  $\mu\text{M}$ ) in presence of PB-GTP buffer, 10  $\mu\text{M}$  paclitaxel, 10  $\mu\text{M}$  nocodazole and 10  $\mu\text{M}$  of compounds **5a-d**. p. 24

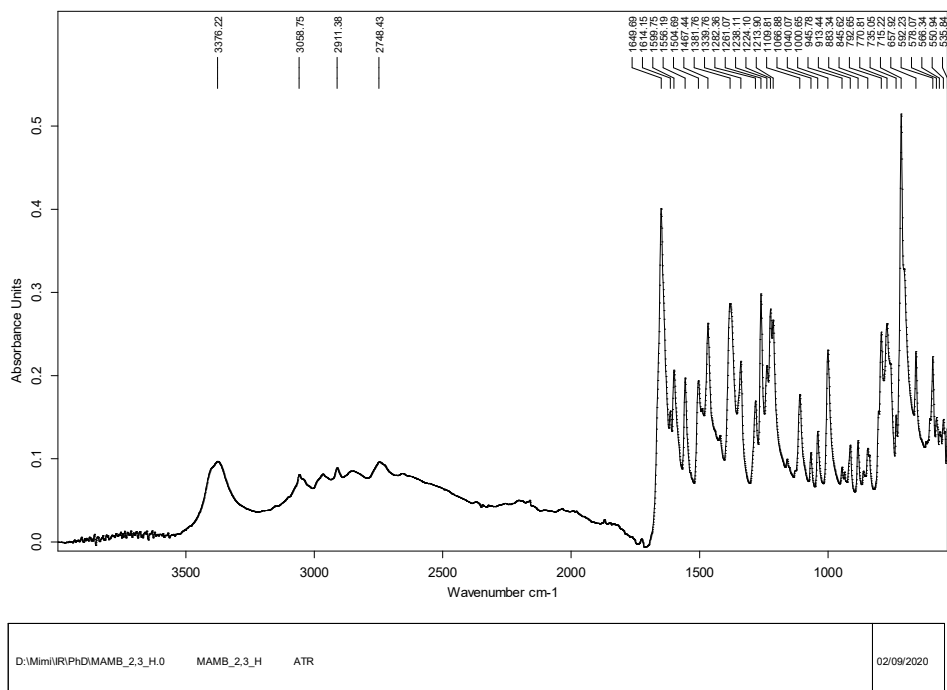

**Fig. S1a.** ATR-IR spectrum of compound **5c**

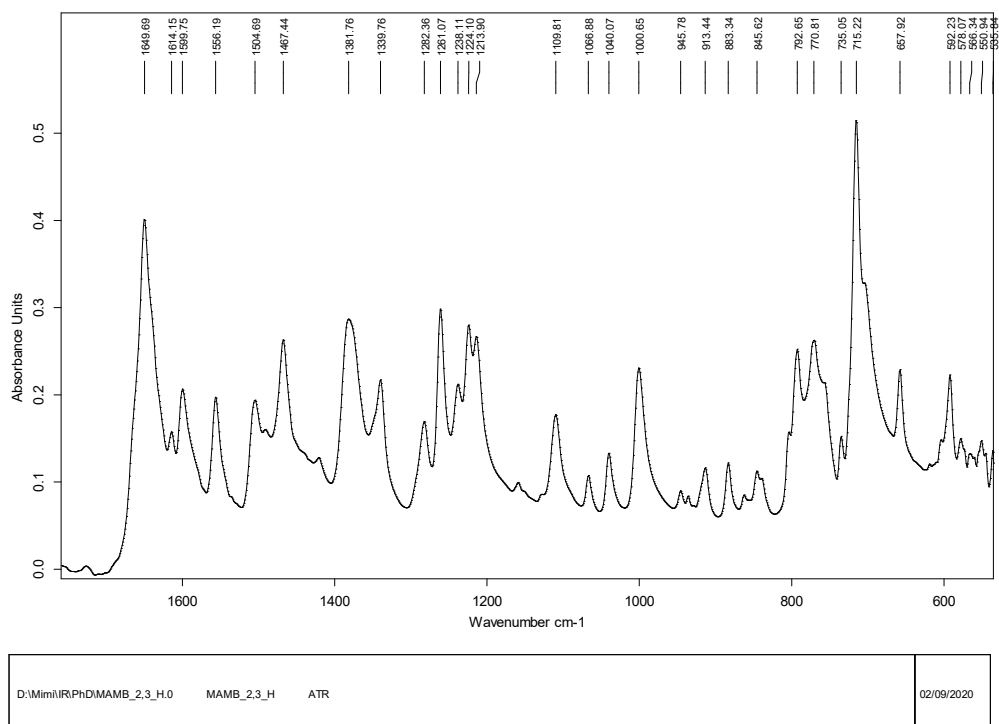

**Fig. S1b.** ATR-IR spectrum of compound **5c**

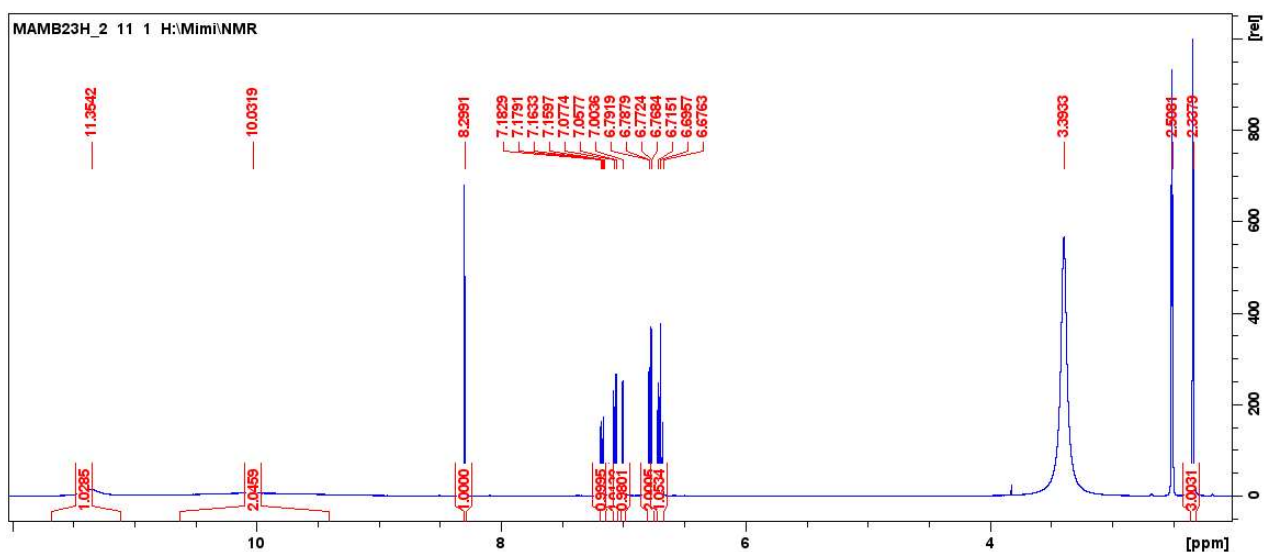

Fig. S2.  $^1\text{H}$  NMR spectrum of compound **5c** in  $\text{DMSO}-d_6$

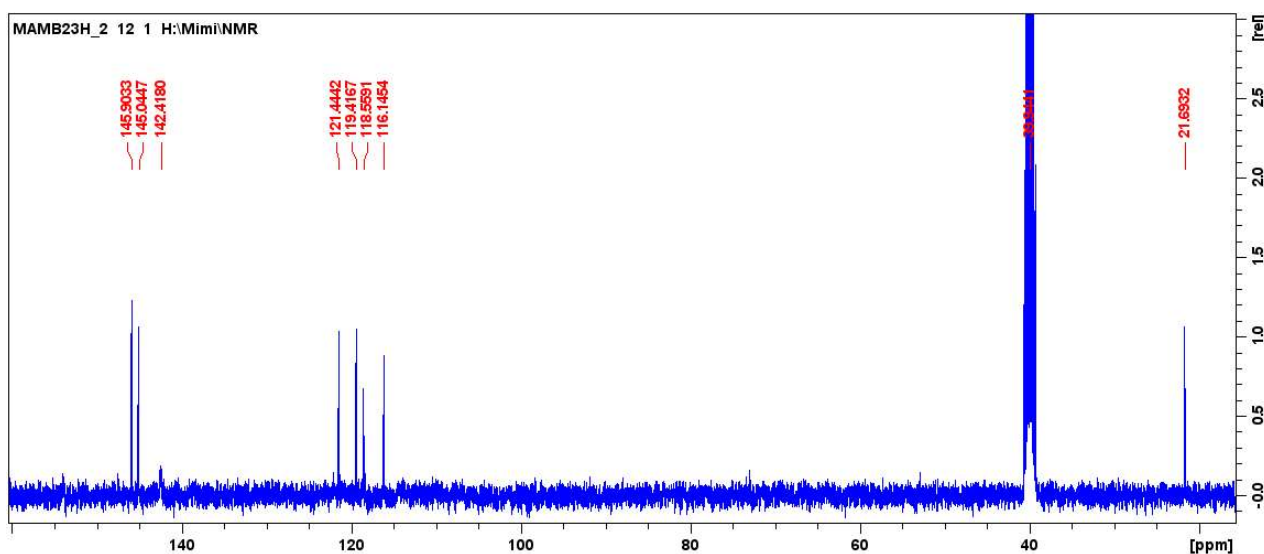

Fig. S3.  $^{13}\text{C}$  NMR spectrum of compound **5c** in  $\text{DMSO}-d_6$

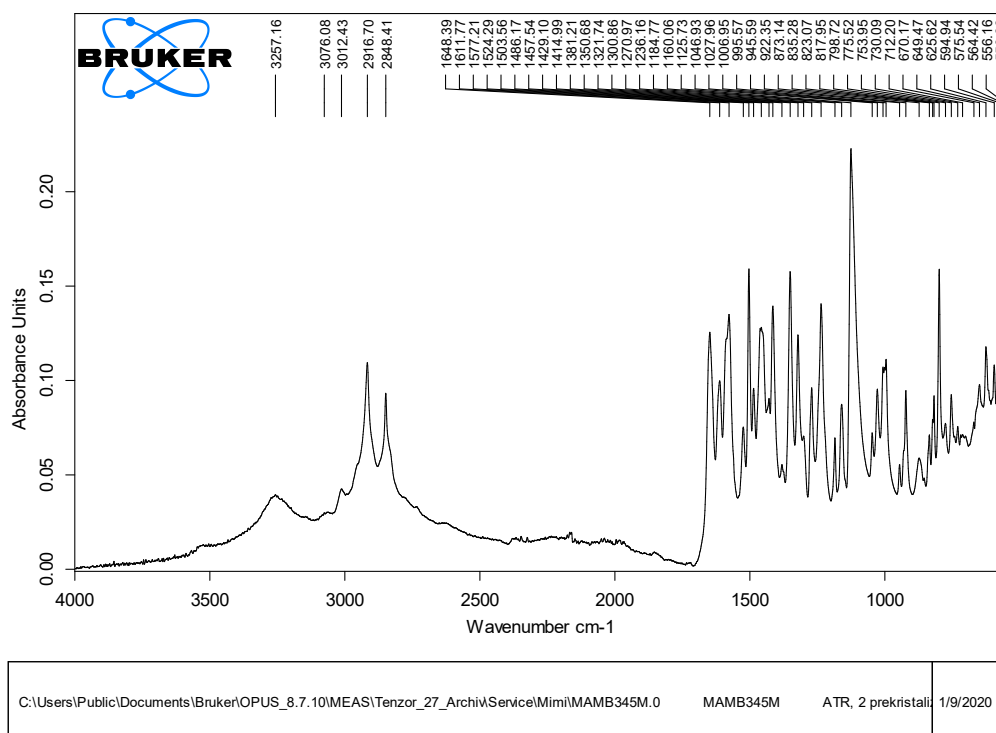

**Fig. S4a.** ATR-IR spectrum of compound **5d**

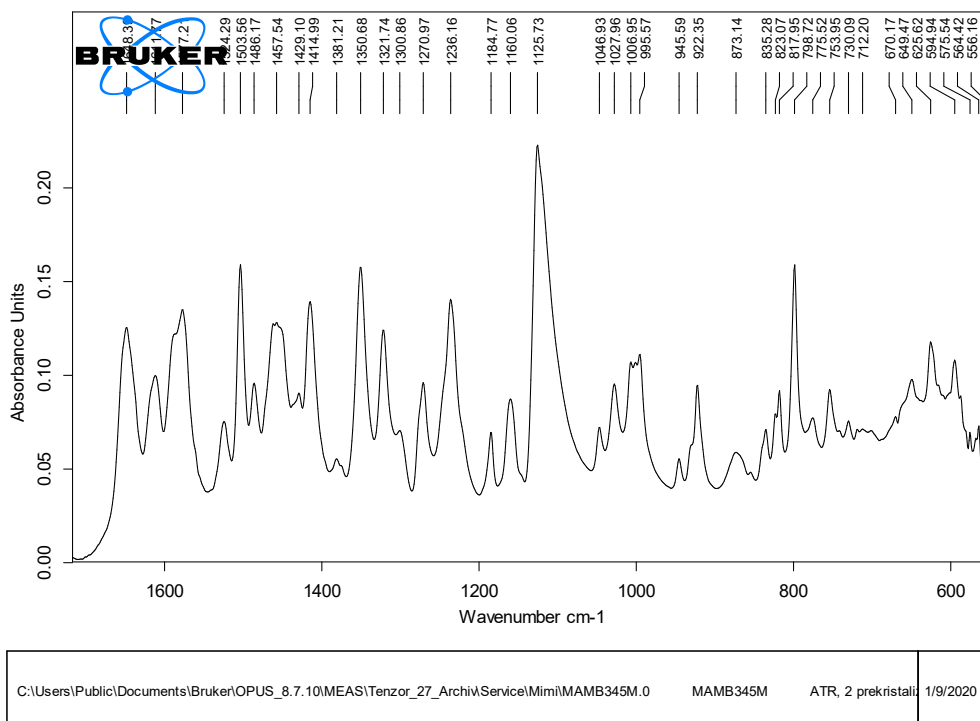

**Fig. S4b.** IR spectrum of compound **5d**

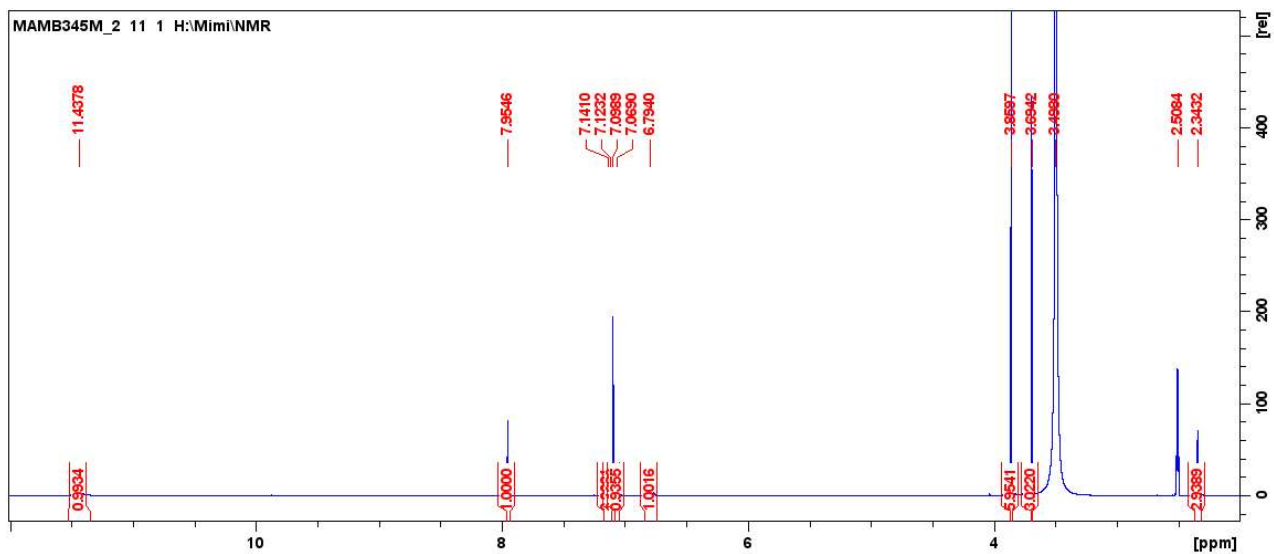

Fig. S5.  $^1\text{H}$  NMR spectrum of compound **5d** in  $\text{DMSO-}d_6$

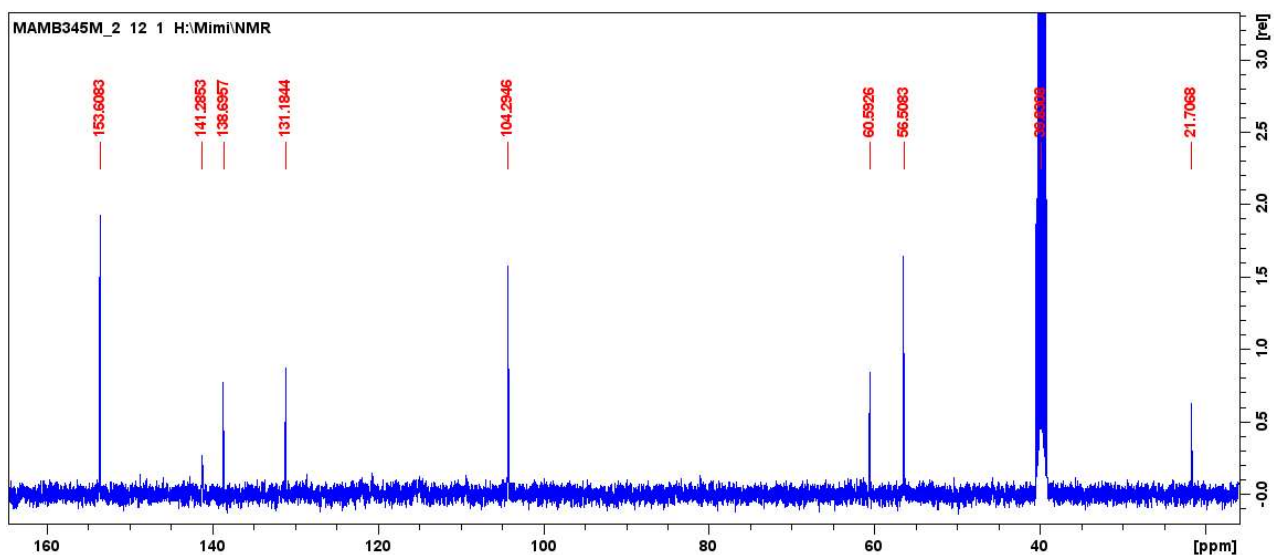

Fig. S6.  $^{13}\text{C}$  NMR spectrum of compound **5d** in  $\text{DMSO-}d_6$

MAB23H\_20240507224148 #43 RT: 0.40 AV: 1 NL: 1.45E+008  
T: FTMS + c ESI Full ms [83.0000-500.0000]

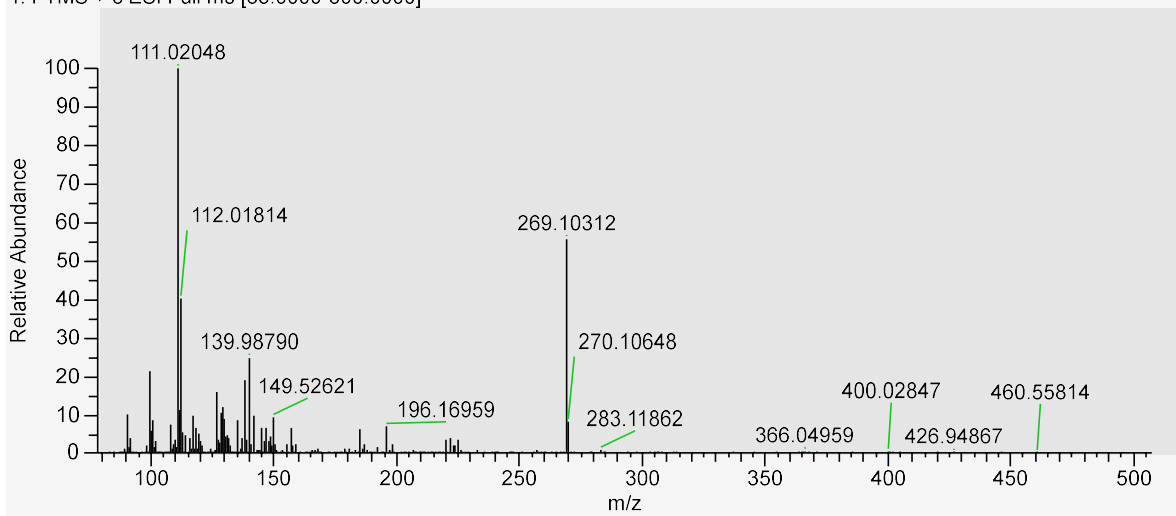

MAB23H\_20240507224148 #42 RT: 0.39 AV: 1 NL: 2.95E+007  
T: FTMS - c ESI Full ms [83.0000-500.0000]

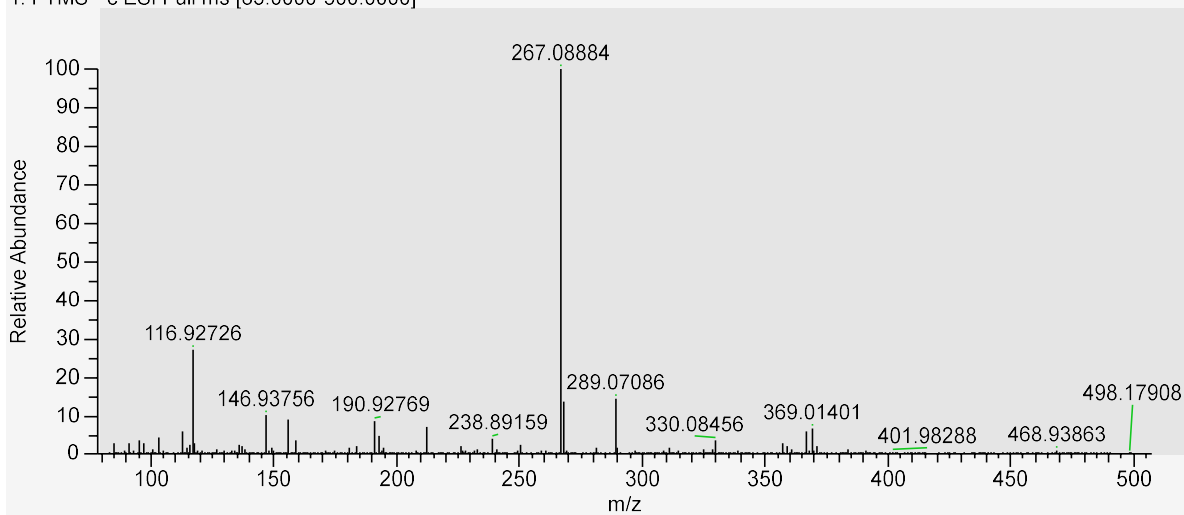

**Figure S7. HRMS spectra of 5a**

MAB345M #705 RT: 6.87 AV: 1 NL: 3.77E+008  
T: FTMS + c ESI Full ms [83.0000-500.0000]

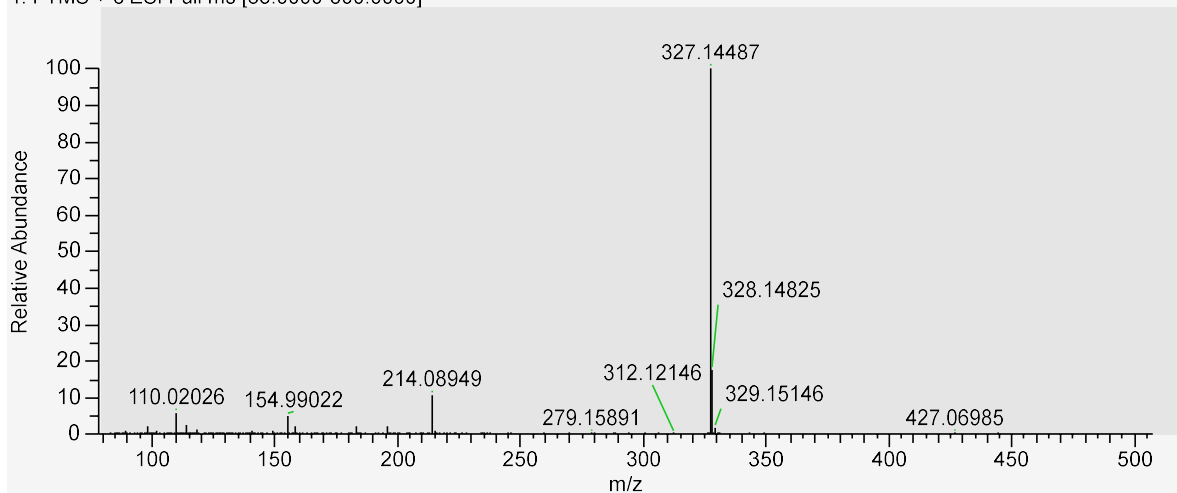

MAB345M #704 RT: 6.86 AV: 1 NL: 9.38E+007  
T: FTMS - c ESI Full ms [83.0000-500.0000]

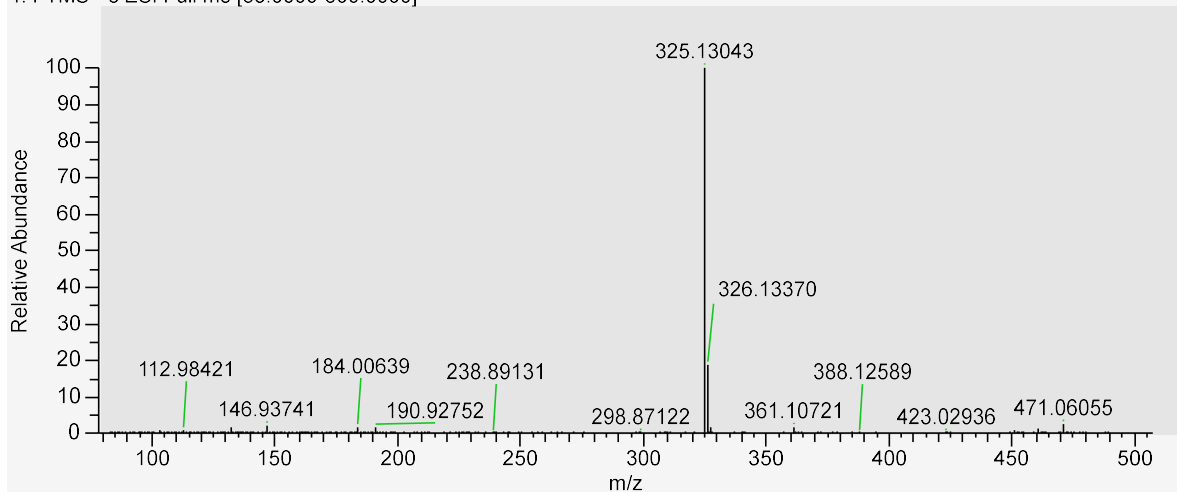

**Figure S8.** HRMS spectra of **5b**



MAMB23H #677 RT: 6.59 AV: 1 NL: 2.71E+008  
T: FTMS + c ESI Full ms [83.0000-500.0000]

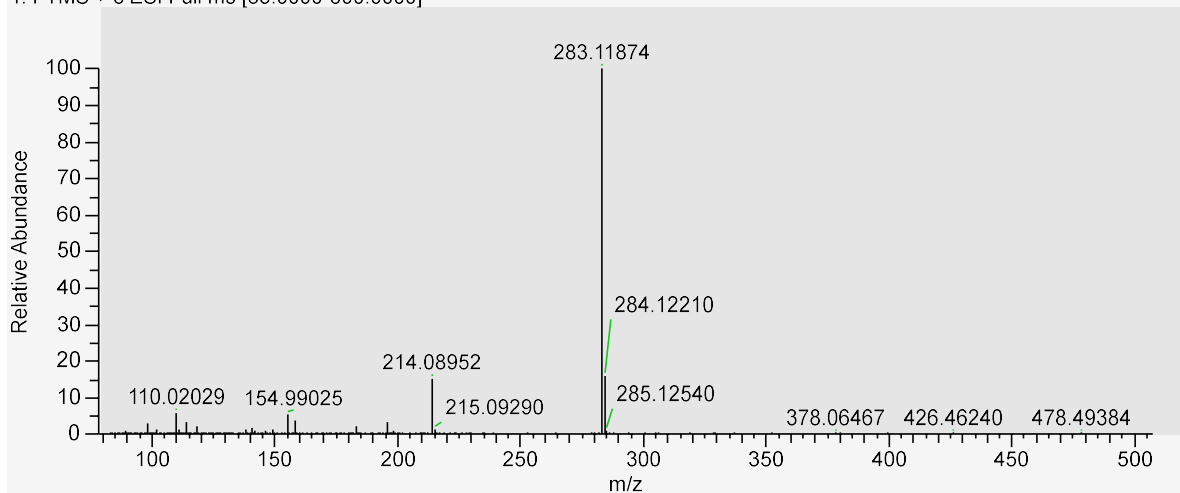

MAMB23H #678 RT: 6.60 AV: 1 NL: 8.85E+007  
T: FTMS - c ESI Full ms [83.0000-500.0000]

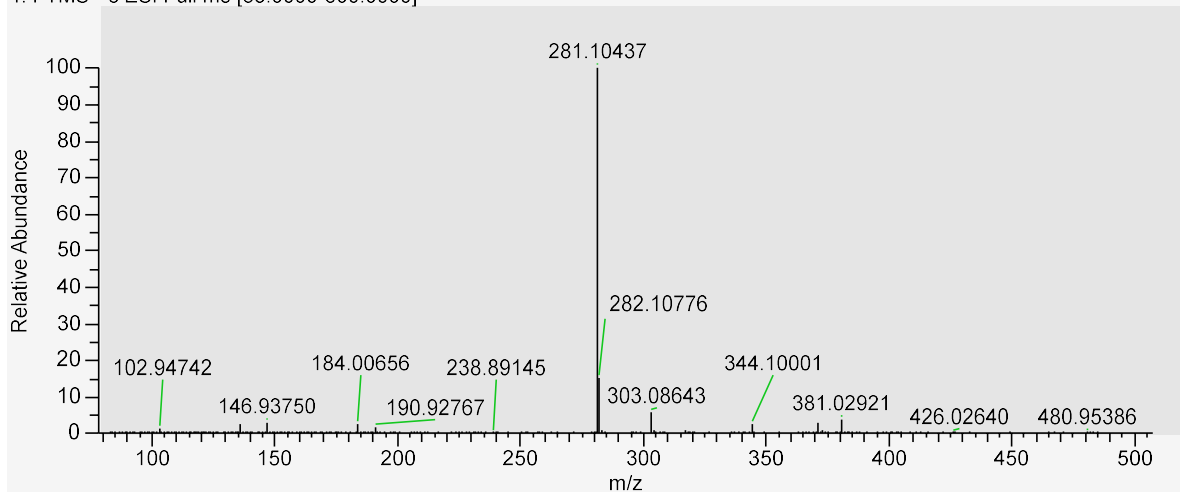

**Figure S9.** HRMS spectra of **5c**

MAMB345M #727 RT: 7.08 AV: 1 NL: 4.31E+008  
T: FTMS + c ESI Full ms [83.0000-500.0000]

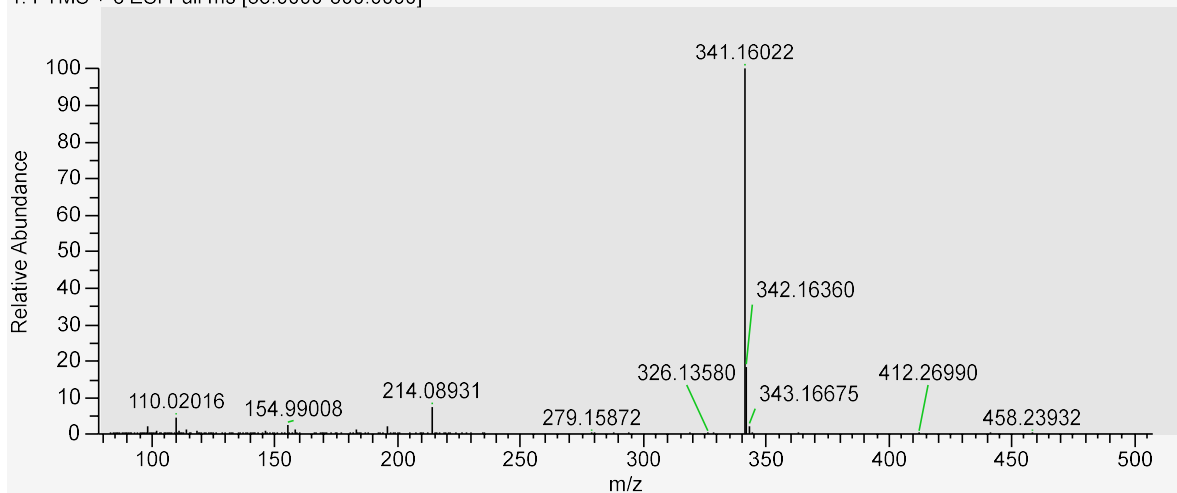

MAMB345M #728 RT: 7.09 AV: 1 NL: 1.09E+008  
T: FTMS - c ESI Full ms [83.0000-500.0000]

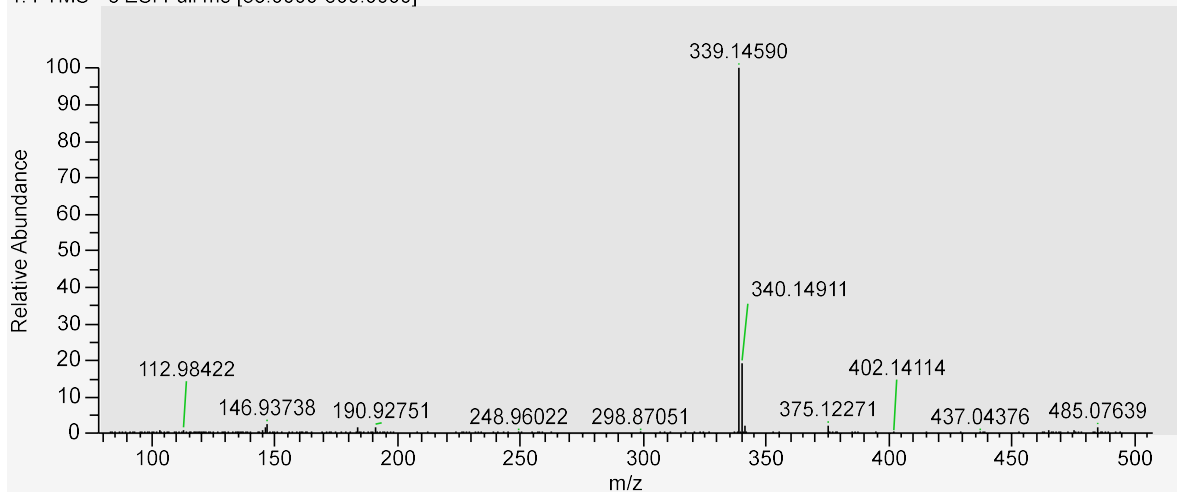

**Figure S10.** HRMS spectra of **5d**

**Table S1.** Optimized molecular structure, total Gibbs energy (in a.u.) and relative Gibbs energies (in kJ mol<sup>-1</sup>) of the possible isomers of compound **5c** in imino tautomeric form, obtained at B3LYP/6-311++G(d,p) level of theory in gas phase and water.

| Medium    | Imino tautomeric form                                                               | $\Delta G$ |
|-----------|-------------------------------------------------------------------------------------|------------|
|           | 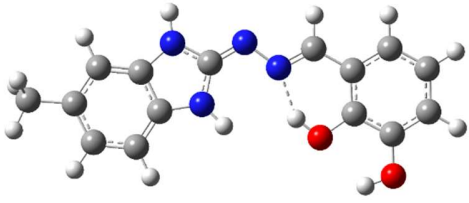  |            |
|           | <i>E, s-trans</i>                                                                   |            |
| gas phase | G <sub>tot</sub> : -949.516836                                                      | -          |
| water     | G <sub>tot</sub> : -949.533431                                                      | -          |
|           |  |            |
|           | <i>Z, s-trans</i>                                                                   |            |
| gas phase | G <sub>tot</sub> : -949.514769                                                      | 5.42       |
| water     | G <sub>tot</sub> : -949.530744                                                      | 7.05       |

**Table S2.** Optimized molecular structure, total Gibbs energies (in a.u.) and relative Gibbs energies (in kJ.mol<sup>-1</sup>) of the possible isomers of compound **5c** in amino tautomeric form, obtained at B3LYP/6-311++G(d,p) level of theory in gas phase and water.

| Medium    |                   | 6-methyl isomer                                                                     | 5-methyl isomer                                                                      |
|-----------|-------------------|-------------------------------------------------------------------------------------|--------------------------------------------------------------------------------------|
|           |                   | 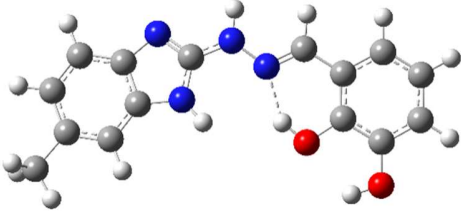   |    |
| gas phase | <i>E, s-trans</i> |                                                                                     |                                                                                      |
|           | $G_{\text{tot}}$  | -949.513467                                                                         | -949.512992                                                                          |
|           | $\Delta G$        | -                                                                                   | 1.24                                                                                 |
| water     | <i>E, s-trans</i> |                                                                                     |                                                                                      |
|           | $G_{\text{tot}}$  | -949.531327 a.u.                                                                    | -949.531095                                                                          |
|           | $\Delta G$        | -                                                                                   | 0.60                                                                                 |
|           |                   |   |   |
| gas phase | <i>Z, s-trans</i> |                                                                                     |                                                                                      |
|           | $G_{\text{tot}}$  | -949.501294                                                                         | -949.501873                                                                          |
|           | $\Delta G$        | 1.52                                                                                | -                                                                                    |
| water     | <i>Z, s-trans</i> |                                                                                     |                                                                                      |
|           | $G_{\text{tot}}$  | -949.516863                                                                         | -949.51753                                                                           |
|           | $\Delta G$        | 1.75                                                                                | -                                                                                    |
|           |                   |  |  |
| gas phase | <i>E, s-cis</i>   |                                                                                     |                                                                                      |
|           | $G_{\text{tot}}$  | -949.507653                                                                         | -949.509719                                                                          |
|           | $\Delta G$        | 5.42                                                                                | -                                                                                    |
| water     | <i>E, s-cis</i>   |                                                                                     |                                                                                      |
|           | $G_{\text{tot}}$  | -949.525408                                                                         | -949.525125                                                                          |
|           | $\Delta G$        | -                                                                                   | 0.74                                                                                 |

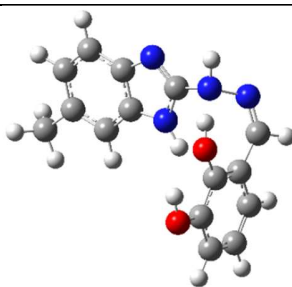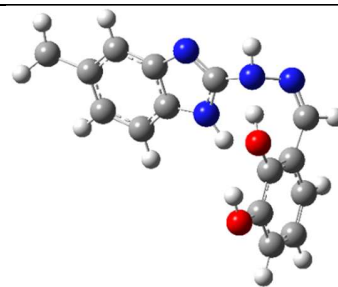

|           |                  |                 |                 |
|-----------|------------------|-----------------|-----------------|
|           |                  | <i>Z, s-cis</i> | <i>Z, s-cis</i> |
| gas phase | $G_{\text{tot}}$ | -949.493624     | -949.493092     |
|           | $\Delta G$       | -               | 1.39            |
| water     | $G_{\text{tot}}$ | -949.509446     | -949.509564     |
|           | $\Delta G$       | 0.30            | -               |

**Table S3.** Summarized total Gibbs energies (in a.u.), relative Gibbs energies (in a.u. and kJ.mol<sup>-1</sup>) and Boltzmann population (in %) for the tautomeric and isomeric forms of compound **5c**, obtained at B3LYP/6-311++G(d,p) level of theory in different media.

| <b>Tautomer/isomer</b> | <b>G<sub>tot</sub></b> | <b>ΔG (a.u.)</b> | <b>ΔG (kJ.mol<sup>-1</sup>)</b> | <b>Boltzmann population</b> |
|------------------------|------------------------|------------------|---------------------------------|-----------------------------|
| <b><i>Gas</i></b>      |                        |                  |                                 |                             |
| imino (E,s-trans)      | -949.516836            | 0                | 0                               | 86.42                       |
| imino (Z,s-trans)      | -949.514769            | 0.002067         | 5.43                            | 9.67                        |
| <b>6-isomer</b>        |                        |                  |                                 |                             |
| amino (E,s-trans)      | -949.513467            | 0.003369         | 8.85                            | 2.43                        |
| amino (Z,s-trans)      | -949.501294            | 0.015542         | 40.81                           |                             |
| amino (E,s-cis)        | -949.507653            | 0.009183         | 24.11                           |                             |
| amino (Z,s-cis)        | -949.493624            | 0.019843         | 52.10                           |                             |
| <b>5-isomer</b>        |                        |                  |                                 |                             |
| amino (E,s-trans)      | -949.512992            | 0.003844         | 10.09                           | 1.48                        |
| amino (Z,s-trans)      | -949.501873            | 0.014963         | 39.29                           |                             |
| amino (E,s-cis)        | -949.509719            | 0.007117         | 18.69                           |                             |
| amino (Z,s-cis)        | -949.493092            | 0.023744         | 62.34                           |                             |
| <b><i>Water</i></b>    |                        |                  |                                 |                             |
| imino (E,s-trans)      | -949.533431            | 0                | 0                               | 79.97                       |
| imino (Z,s-trans)      | -949.530744            | 0.002687         | 7.05                            | 4.65                        |
| <b>6-isomer</b>        |                        |                  |                                 |                             |
| amino (E,s-trans)      | -949.531327            | 0.002104         | 5.52                            | 8.63                        |
| amino (Z,s-trans)      | -949.516863            | 0.016568         | 43.50                           |                             |
| amino (E,s-cis)        | -949.525408            | 0.008023         | 21.06                           |                             |
| amino (Z,s-cis)        | -949.509446            | 0.023985         | 62.97                           |                             |
| <b>5-isomer</b>        |                        |                  |                                 |                             |
| amino (E,s-trans)      | -949.531095            | 0.002336         | 6.13                            | 6.75                        |
| amino (Z,s-trans)      | -949.51753             | 0.015901         | 41.75                           |                             |
| amino (E,s-cis)        | -949.525125            | 0.008306         | 21.81                           |                             |
| amino (Z,s-cis)        | -949.509564            | 0.023867         | 62.66                           |                             |
| <b><i>DMSO</i></b>     |                        |                  |                                 |                             |
| imino (E,s-trans)      | -949.532308            | 0                | 0                               | 53.25                       |
| <b>6-isomer</b>        |                        |                  |                                 |                             |
| amino (E,s-trans)      | -949.531449            | 0.000859         | 2.26                            | 21.40                       |
| <b>5-isomer</b>        |                        |                  |                                 |                             |
| amino (E,s-trans)      | -949.531607            | 0.000701         | 1.84                            | 25.35                       |

**Table S4.** Optimized molecular structure, total Gibbs energy (in a.u.) and relative Gibbs energies (in kJ mol<sup>-1</sup>) of the possible isomers of compound **5d** in imino tautomeric form, obtained at B3LYP/6-311++G(d,p) level of theory in gas phase and water.

| Medium    | Imino tautomeric form                                                               | $\Delta G$ |
|-----------|-------------------------------------------------------------------------------------|------------|
|           | 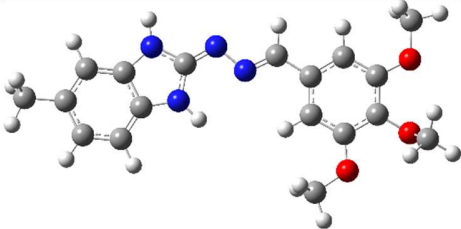  |            |
|           | <i>E, s-trans</i>                                                                   |            |
| gas phase | G <sub>tot</sub> : -1142,585534                                                     | -          |
| water     | G <sub>tot</sub> : -1142,605514                                                     | -          |
|           |  |            |
|           | <i>Z, s-trans</i>                                                                   |            |
| gas phase | G <sub>tot</sub> : -1142,582568                                                     | 7.78       |
| water     | G <sub>tot</sub> : -1142,604003                                                     | 15.43      |

**Table S5.** Optimized molecular structure, total Gibbs energies (in a.u.) and relative Gibbs energies (in kJ.mol<sup>-1</sup>) of the possible isomers of compound **5d** in amino tautomeric form, obtained at B3LYP/6-311++G(d,p) level of theory in gas phase and water.

| Medium    |                   | 6-methyl isomer                                                                     | 5-methyl isomer                                                                      |
|-----------|-------------------|-------------------------------------------------------------------------------------|--------------------------------------------------------------------------------------|
|           |                   | 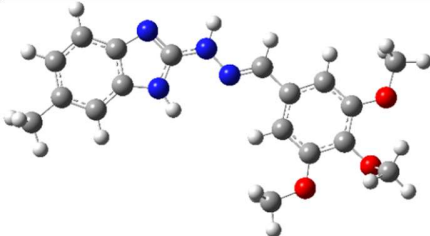   |    |
| gas phase | <i>E, s-trans</i> |                                                                                     |                                                                                      |
|           | $G_{\text{tot}}$  | -1142.589796                                                                        | -1142.589791                                                                         |
|           | $\Delta G$        | -                                                                                   | 0.01                                                                                 |
| water     | $G_{\text{tot}}$  | -1142.610250                                                                        | -1142.611019                                                                         |
|           | $\Delta G$        | -                                                                                   | 2.01                                                                                 |
|           |                   |   |   |
| gas phase | <i>Z, s-trans</i> |                                                                                     |                                                                                      |
|           | $G_{\text{tot}}$  | -1142.583297                                                                        | -1142.582924.                                                                        |
|           | $\Delta G$        | -                                                                                   | 0.97                                                                                 |
| water     | $G_{\text{tot}}$  | -1142.602714                                                                        | -1142.602627                                                                         |
|           | $\Delta G$        | -                                                                                   | 0.22                                                                                 |
|           |                   |  |  |
| gas phase | <i>E, s-cis</i>   |                                                                                     |                                                                                      |
|           | $G_{\text{tot}}$  | -1142.580100                                                                        | -1142.580055                                                                         |
|           | $\Delta G$        | -                                                                                   | 0.11                                                                                 |
| water     | $G_{\text{tot}}$  | -1142.601929                                                                        | -1142.601816                                                                         |
|           | $\Delta G$        | -                                                                                   | 0.29                                                                                 |



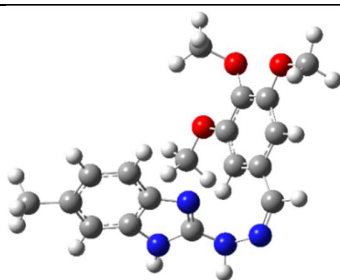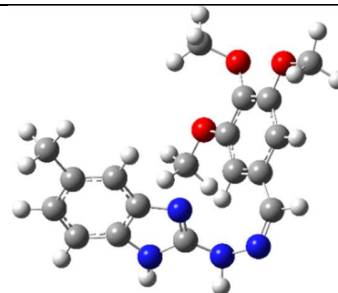

|                  |                        |                                 |                                 |
|------------------|------------------------|---------------------------------|---------------------------------|
| <b>gas phase</b> | <b>G<sub>tot</sub></b> | <i>Z, s-cis</i><br>-1142.564804 | <i>Z, s-cis</i><br>-1142.565265 |
|                  | <b>ΔG</b>              | 1.21                            | -                               |
| <b>water</b>     | <b>G<sub>tot</sub></b> | -1142.587979                    | -1142.589262                    |
|                  | <b>ΔG</b>              | 3.36                            | -                               |

**Table S6.** Summarized total Gibbs energies (in a.u.), relative Gibbs energies (in a.u. and kJ.mol<sup>-1</sup>) and Boltzmann population (in %) for all tautomeric and isomeric forms of compound **5d**, obtained at B3LYP/6-311++G(d,p) level of theory in gas phase and water.

| Tautomer/isomer   | G <sub>tot</sub> | ΔG (a.u.)          | ΔG (kJ.mol <sup>-1</sup> ) | Boltzmann population |
|-------------------|------------------|--------------------|----------------------------|----------------------|
| <i>Gas</i>        |                  |                    |                            |                      |
| imino (E,s-trans) | -1142.585534     | 0.004262           | 11.19                      |                      |
| imino (Z,s-trans) | -1142.582568     | 0.007228           | 18.98                      |                      |
| <b>6-isomer</b>   |                  |                    |                            |                      |
| amino (E,s-trans) | -1142.589796     | 0                  | 0                          | 51.10                |
| amino (Z,s-trans) | -1142.583297     | 0.006499           | 17.06                      |                      |
| amino (E,s-cis)   | -1142.580100     | 0.009696           | 25.46                      |                      |
| amino (Z,s-cis)   | -1142.564804     | 0.024992           | 65.62                      |                      |
| <b>5-isomer</b>   |                  |                    |                            |                      |
| amino (E,s-trans) | -1142.589791     | 5.10 <sup>-6</sup> | 0.01                       | 49.90                |
| amino (Z,s-trans) | -1142.582924     | 0.006872           | 18.04                      |                      |
| amino (E,s-cis)   | -1142.580055     | 0.009741           | 25.57                      |                      |
| amino (Z,s-cis)   | -1142.565265     | 0.024531           | 64.41                      |                      |
| <i>Water</i>      |                  |                    |                            |                      |
| imino (E,s-trans) | -1142.605514     | 0.005505           | 14.45                      |                      |
| imino (Z,s-trans) | -1142.604003     | 0.007016           | 18.42                      |                      |
| <b>6-isomer</b>   |                  |                    |                            |                      |
| amino (E,s-trans) | -1142.610250     | 0.000769           | 2.02                       | 30.69                |
| amino (Z,s-trans) | -1142.602714     | 0.008305           | 21.80                      |                      |
| amino (E,s-cis)   | -1142.601929     | 0.00909            | 23.87                      |                      |
| amino (Z,s-cis)   | -1142.587979     | 0.02304            | 60.49                      |                      |
| <b>5-isomer</b>   |                  |                    |                            |                      |
| amino (E,s-trans) | -1142.611019     | 0                  | 0                          | 69.31                |
| amino (Z,s-trans) | -1142.602627     | 0.008392           | 22.03                      |                      |
| amino (E,s-cis)   | -1142.601816     | 0.009203           | 24.16                      |                      |
| amino (Z,s-cis)   | -1142.589262     | 0.021757           | 57.12                      |                      |
| <i>DMSO</i>       |                  |                    |                            |                      |
| imino (E,s-trans) | -1142.602682     | 0.007986           | 20.97                      |                      |
| <b>6-isomer</b>   |                  |                    |                            |                      |
| amino (E,s-trans) | -1142.610668     | 0                  | 0                          | 59.95                |
| <b>5-isomer</b>   |                  |                    |                            |                      |
| amino (E,s-trans) | -1142.610288     | 0.00038            | 1.00                       | 40.05                |

**Table S7.** Chemical shifts (in ppm) for the imino form, 5-methyl isomer sand 6-methyl isomer of the amino form of compound **5c** predicted by GIAO method using B3LYP functional and 6-311++G\*\* basis set calculations in DMSO solvent and experimental data for **5c**.

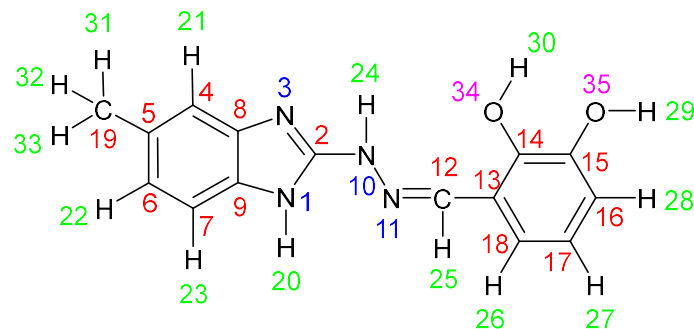

| B3LYP/6-311++G** DMSO |                                          |                |                |                                  |                |                                  |                |
|-----------------------|------------------------------------------|----------------|----------------|----------------------------------|----------------|----------------------------------|----------------|
| C<br>Atom №           | $\delta_{\text{exp. in}}$<br>DMSO- $d_6$ | Imino form     |                | 5-methyl isomer in<br>amino form |                | 6-methyl isomer in<br>amino form |                |
|                       |                                          | chem.<br>shift | rel. to<br>TMS | chem.<br>shift                   | rel. to<br>TMS | chem. shift                      | rel. to<br>TMS |
| 5                     | 121.44                                   | 55.7767        | 128.8          | 43.6309                          | 140.9          | 54.6946                          | 129.9          |
| 4                     | 118.55                                   | 70.5148        | 114.0          | 61.477                           | 123.1          | 61.8959                          | 122.7          |
| 6                     | 142.41                                   | 42.6670        | 141.9          | 56.1349                          | 128.4          | 44.8265                          | 139.7          |
| 8                     | 145.04                                   | 48.2187        | 136.3          | 33.4201                          | 151.1          | 35.7915                          | 148.8          |
| 7                     | 116.14                                   | 69.0386        | 115.5          | 69.5873                          | 114.9          | 69.0442                          | 115.5          |
| 9                     | 142.41                                   | 46.1206        | 138.4          | 46.1212                          | 138.4          | 44.0197                          | 140.5          |
| 2                     | 145.90                                   | 25.3236        | 159.2          | 28.2886                          | 156.2          | 28.6183                          | 155.9          |
| 12                    | 145.04                                   | 25.8879        | 158.7          | 34.7429                          | 149.8          | 34.65                            | 149.9          |
| 13                    | 119.41                                   | 57.4188        | 127.1          | 59.3038                          | 125.3          | 58.9294                          | 125.6          |
| 18                    | 121.44                                   | 57.0677        | 127.5          | 57.4073                          | 127.1          | 56.7223                          | 127.8          |
| 14                    | 145.90                                   | 31.2122        | 153.4          | 32.7338                          | 151.8          | 32.0896                          | 152.5          |
| 17                    | 121.44                                   | 58.167         | 126.4          | 56.7322                          | 127.8          | 57.089                           | 127.5          |

|                |           |          |       |          |       |          |       |
|----------------|-----------|----------|-------|----------|-------|----------|-------|
| 15             | 145.90    | 31.3152  | 153.2 | 30.4474  | 154.1 | 30.824   | 153.7 |
| 16             | 118.55    | 63.8011  | 120.8 | 62.0727  | 122.5 | 62.2033  | 122.3 |
| 19             | 31.69     | 160.9968 | 23.6  | 160.8786 | 23.7  | 160.8177 | 23.7  |
| H Atom         |           |          |       |          |       |          |       |
| N <sub>2</sub> |           |          |       |          |       |          |       |
| 21             | 6.99      | 24.7542  | 7.2   | 24.4974  | 7.4   | 24.4566  | 7.5   |
| 23             | 7.17-7.16 | 24.7444  | 7.2   | 24.4042  | 7.5   | 24.5319  | 7.4   |
| 20             | 11.36     | 24.1828  | 7.8   | 23.694   | 8.3   | 23.6377  | 8.3   |
| 25             | 8.28      | 24.9762  | 6.9   | 23.9583  | 8.0   | 23.8575  | 8.1   |
| 24             | -         | 23.32    | 8.6   | 23.9835  | 7.9   | 23.9284  | 8.0   |
| 22             | 7.06-7.04 | 24.8098  | 7.1   | 24.8379  | 7.1   | 24.571   | 7.4   |
| 27             | 6.69-6.67 | 24.9239  | 7.0   | 21.6753  | 10.3  | 24.8774  | 7.1   |
| 30             | 9.34      | 20.0768  | 11.9  | 24.8807  | 7.1   | 21.6214  | 10.3  |
| 26             | 6.77-6.75 | 24.9005  | 7.0   | 24.6416  | 7.3   | 24.9113  | 7.1   |
| 28             | 6.77-6.75 | 24.8502  | 7.1   | 26.3282  | 5.6   | 24.7245  | 7.2   |
| 29             | 9.34      | 26.3549  | 5.6   | 29.3535  | 2.6   | 26.2931  | 5.7   |
| 32             | 2.32      | 29.3897  | 2.6   | 29.7879  | 2.1   | 29.2003  | 2.7   |
| 31             | 2.32      | 29.396   | 2.6   | 29.3012  | 2.6   | 29.2892  | 2.7   |
| 33             | 2.32      | 29.8073  | 2.1   | 24.6493  | 7.3   | 29.8911  | 2.1   |

**Table S8.** Chemical shifts (in ppm) for the 5-methyl isomer and 6-methyl isomer of the amino form of compound **5d** predicted by GIAO method using B3LYP functional and 6-311++G\*\* basis set calculations in DMSO solvent and experimental data for **5d**.

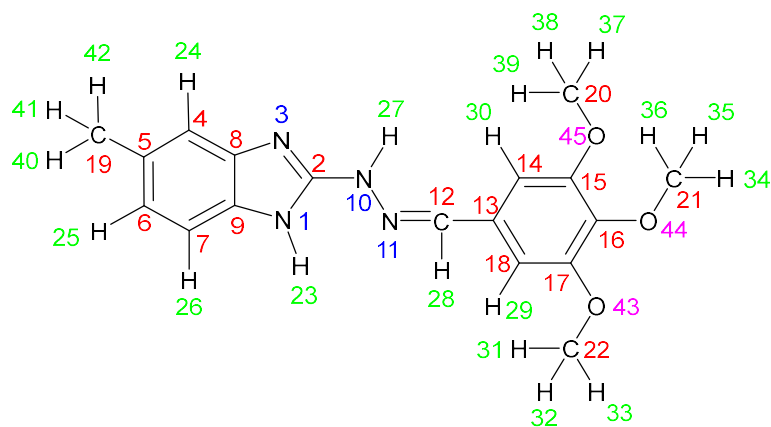

| C Atom No | $\delta_{\text{Exp.}}$ in<br>DMSO- $d_6$ | 6-methyl isomer in<br>amino form |                | 5-methyl isomer in<br>amino form |                |
|-----------|------------------------------------------|----------------------------------|----------------|----------------------------------|----------------|
|           |                                          | chem.<br>shift                   | rel. to<br>TMS | chem.<br>shift                   | rel. to<br>TMS |
| 5         | 131.18                                   | 55.0135                          | 129.5          | 43.9386                          | 140.6          |
| 4         | 131.18                                   | 61.8759                          | 122.7          | 61.7245                          | 122.8          |
| 6         | 138.69                                   | 45.0612                          | 139.5          | 57.0824                          | 127.5          |
| 8         | 153.60                                   | 35.3683                          | 149.2          | 32.6431                          | 151.9          |
| 7         | 104.29                                   | 69.3288                          | 115.2          | 69.9332                          | 114.6          |
| 9         | 138.69                                   | 44.0731                          | 140.5          | 46.0336                          | 138.5          |
| 2         | 153.60                                   | 26.9442                          | 157.6          | 26.7588                          | 157.8          |
| 12        | 141.28                                   | 37.8856                          | 146.7          | 37.6092                          | 146.9          |
| 13        | 138.69                                   | 45.8021                          | 138.8          | 46.2601                          | 138.3          |
| 18        | 104.29                                   | 82.4458                          | 102.1          | 82.2531                          | 102.3          |
| 14        | 104.29                                   | 74.7445                          | 109.8          | 73.3204                          | 111.2          |
| 17        | 153.60                                   | 20.4700                          | 164.1          | 20.3526                          | 164.2          |

|          |           |          |       |          |       |
|----------|-----------|----------|-------|----------|-------|
| 15       | 153.60    | 21.3767  | 163.2 | 20.9407  | 163.6 |
| 16       | 141.28    | 37.7587  | 146.8 | 36.8681  | 147.7 |
| 20       | 56.50     | 126.9329 | 57.6  | 126.3548 | 58.2  |
| 22       | 56.50     | 126.2986 | 58.3  | 125.771  | 58.8  |
| 21       | 60.59     | 121.2851 | 63.3  | 121.3134 | 63.2  |
| 19       | 21.70     | 160.8036 | 23.8  | 160.6998 | 23.9  |
| H Atom № |           |          |       |          |       |
| 24       | 7.17-7.05 | 24.5066  | 7.4   | 24.5080  | 7.4   |
| 26       | 7.17-7.05 | 24.5864  | 7.4   | 24.4192  | 7.5   |
| 23       | 11.38     | 23.2296  | 8.7   | 23.2109  | 8.7   |
| 28       | 7.95      | 24.2383  | 7.7   | 24.1798  | 7.8   |
| 27       | -         | 23.8798  | 8.1   | 23.9441  | 8.0   |
| 29       | 7.17-7.05 | 24.5861  | 7.4   | 24.7363  | 7.2   |
| 30       | 6.82-6.76 | 25.4045  | 6.5   | 24.5438  | 7.4   |
| 39       | 3.89-3.70 | 28.1858  | 3.8   | 25.3911  | 6.5   |
| 38       | 3.89-3.70 | 28.1533  | 3.8   | 28.1066  | 3.8   |
| 37       | 3.89-3.70 | 27.7777  | 4.2   | 28.126   | 3.8   |
| 32       | 3.89-3.70 | 28.0180  | 3.9   | 27.7053  | 4.2   |
| 31       | 3.89-3.70 | 28.0352  | 3.9   | 27.9863  | 3.9   |
| 33       | 3.89-3.70 | 27.6460  | 4.3   | 27.9857  | 3.9   |
| 25       | 7.17-7.05 | 24.6049  | 7.3   | 27.6808  | 4.3   |
| 36       | 3.89-3.70 | 28.3043  | 3.6   | 28.0531  | 3.9   |
| 34       | 3.89-3.70 | 28.0007  | 3.9   | 28.4023  | 3.5   |
| 35       | 3.89-3.70 | 27.8828  | 4.1   | 28.0407  | 3.9   |
| 40       | 2.35      | 29.2756  | 2.7   | 29.2027  | 2.7   |

|    |      |         |     |         |     |
|----|------|---------|-----|---------|-----|
| 41 | 2.35 | 29.7639 | 2.2 | 29.2743 | 2.6 |
| 42 | 2.35 | 29.4015 | 2.5 | 29.9443 | 2.0 |

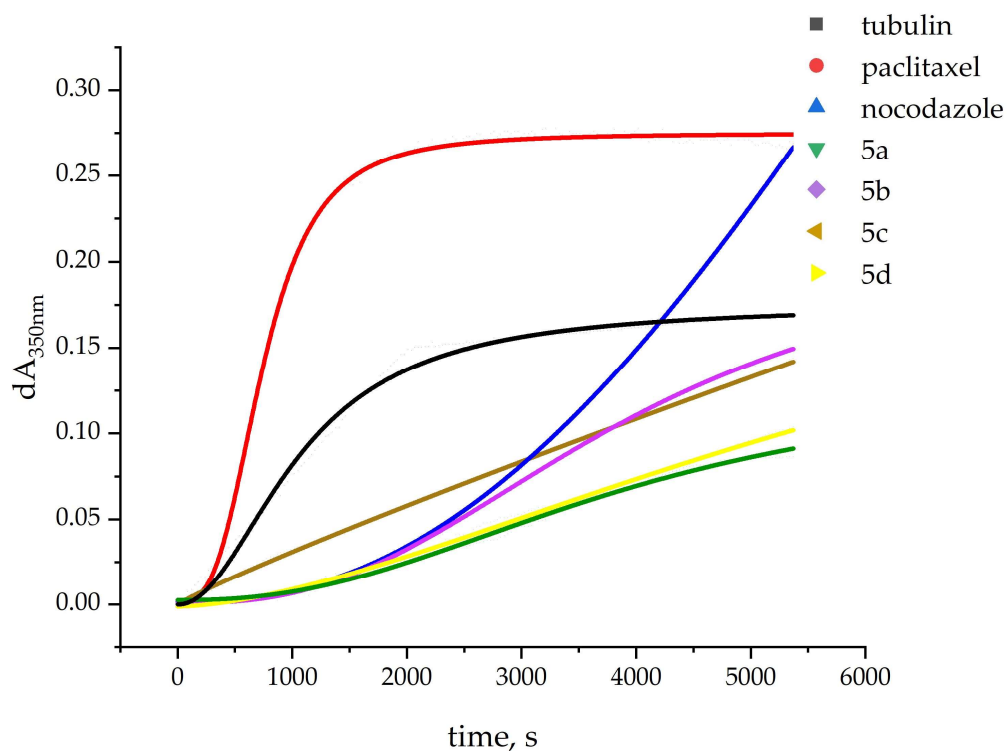

**Figure S11.** Tubulin (final 54  $\mu\text{M}$ ) in presence of PB-GTP buffer, 10  $\mu\text{M}$  paclitaxel, 10  $\mu\text{M}$  nocodazole and 10  $\mu\text{M}$  of compounds **5a-d**. Reaction was conducted in a thermostated spec-trophotometric chamber at 37° C for 90 min. Turbidity was measured at 350 nm every 30 sec. Data for compounds **5a** and **5b** from [37].
